# Supplementary material for: First principles static and dynamic calculations for the transition metal hydride seriesMH4L3(M= Fe, Ru and Os;L= NH3, PH3and PF3)
Source: Royal Society of Chemistry journal article supplement (doi:10.1039/c4dt02475c), 2015-01-01
Supplement: c4dt02475c1.pdf [file c4dt02475c1.pdf]

**First principles static and dynamic calculations for the transition metal hydride series  
MH<sub>4</sub>L<sub>3</sub> (M= Fe, Ru and Os; L = NH<sub>3</sub>, PH<sub>3</sub> and PF<sub>3</sub>)**

Nicolas Sieffert,<sup>a,b</sup> Thomas Kendrick,<sup>c</sup> Davide Tiana<sup>d</sup> and Carole A. Morrison<sup>c</sup> \*  
[c.morrison@ed.ac.uk](mailto:c.morrison@ed.ac.uk)

<sup>a</sup> Univ. Grenoble Alpes, DCM, F-38000 Grenoble, France.

<sup>b</sup> CNRS, DCM, F-38000, Grenoble, France.

<sup>c</sup> School of Chemistry, and EaSTCHEM Research School, University of Edinburgh, The King's Buildings, West Mains Road, Edinburgh, EH9 3JJ. United Kingdom.

<sup>d</sup> Department of Chemistry, University of Bath, Claverton Down, Bath, BA2 7AY. United Kingdom.

-- Supporting Information --

**Full reference 23:**

Gaussian 09, Revision A.02, M. J. Frisch, G. W. Trucks, H. B. Schlegel, G. E. Scuseria, M. A. Robb, J. R. Cheeseman, G. Scalmani, V. Barone, B. Mennucci, G. A. Petersson, H. Nakatsuji, M. Caricato, X. Li, H. P. Hratchian, A. F. Izmaylov, J. Bloino, G. Zheng, J. L. Sonnenberg, M. Hada, M. Ehara, K. Toyota, R. Fukuda, J. Hasegawa, M. Ishida, T. Nakajima, Y. Honda, O. Kitao, H. Nakai, T. Vreven, J. A. Montgomery, Jr., J. E. Peralta, F. Ogliaro, M. Bearpark, J. J. Heyd, E. Brothers, K. N. Kudin, V. N. Staroverov, R. Kobayashi, J. Normand, K. Raghavachari, A. Rendell, J. C. Burant, S. S. Iyengar, J. Tomasi, M. Cossi, N. Rega, J. M. Millam, M. Klene, J. E. Knox, J. B. Cross, V. Bakken, C. Adamo, J. Jaramillo, R. Gomperts, R. E. Stratmann, O. Yazyev, A. J. Austin, R. Cammi, C. Pomelli, J. W. Ochterski, R. L. Martin, K. Morokuma, V. G. Zakrzewski, G. A. Voth, P. Salvador, J. J. Dannenberg, S. Dapprich, A. D. Daniels, O. Farkas, J. B. Foresman, J. V. Ortiz, J. Cioslowski and D. J. Fox, Gaussian, Inc., Wallingford CT, 2009.

**Table S1:** Characteristics of the transition states and rate constants.

| <b>M</b> | <b>L</b>        | <b>Isomer</b><br>(a) | <b>Type</b><br>(b) | <b><math>\nu</math></b><br>( $\text{cm}^{-1}$ )(b) | <b><math>T_c</math></b><br>(K)(c) | <b><math>\kappa_{\text{Wigner}}</math></b><br>(d) | <b><math>k_{\text{TST}}</math></b><br>( $\text{s}^{-1}$ ) (e) | <b><math>k'</math></b><br>( $\text{s}^{-1}$ ) (f) |
|----------|-----------------|----------------------|--------------------|----------------------------------------------------|-----------------------------------|---------------------------------------------------|---------------------------------------------------------------|---------------------------------------------------|
| Fe       | NH <sub>3</sub> | Non-class. perp      | T.S.               | -379.0                                             | 87                                | 1.10                                              | 2.33E+08                                                      | 2.56E+08                                          |
|          |                 | TS scrambling        | T.S.               | -316.2                                             | 72                                | 1.07                                              | 8.44E+11                                                      | 9.03E+11                                          |
| Fe       | PH <sub>3</sub> | Non-class. perp      | T.S.               | -119.2                                             | 27                                | 1.01                                              | 1.30E+12                                                      | 1.31E+12                                          |
|          |                 | Classical            | T.S.               | -171.5                                             | 39                                | 1.02                                              | 2.01E+10                                                      | 2.05E+10                                          |
| Fe       | PF <sub>3</sub> | TS rotation          | T.S.               | -107.1                                             | 25                                | 1.01                                              | 6.31E+12                                                      | 6.36E+12                                          |
|          |                 | Classical            | T.S.               | -186.0                                             | 43                                | 1.02                                              | 4.14E+08                                                      | 4.24E+08                                          |
| Ru       | NH <sub>3</sub> | Non-class. Perp      | T.S.               | -205.0                                             | 47                                | 1.03                                              | 6.35E+09                                                      | 6.54E+09                                          |
| Ru       | PH <sub>3</sub> | Non-class. perp      | T.S.               | -274.4                                             | 63                                | 1.05                                              | 4.75E+11                                                      | 5.00E+11                                          |
|          |                 | TS scrambling        | T.S.               | -433.4                                             | 99                                | 1.13                                              | 8.44E+11                                                      | 9.55E+11                                          |
| Ru       | PF <sub>3</sub> | Non-class. perp      | T.S.               | -169.1                                             | 39                                | 1.02                                              | 2.00E+12                                                      | 2.04E+12                                          |
|          |                 | TS scrambling        | T.S.               | -200.4                                             | 46                                | 1.03                                              | 7.35E+08                                                      | 7.56E+08                                          |
| Os       | NH <sub>3</sub> | Non-class. perp      | T.S.               | -49.0                                              | 11                                | 1.00                                              | 1.51E+07                                                      | 1.52E+07                                          |
| Os       | PH <sub>3</sub> | Non-class. perp      | T.S.               | -309.6                                             | 71                                | 1.07                                              | 3.57E+09                                                      | 3.81E+09                                          |
|          |                 | TS scrambling        | T.S.               | -324.4                                             | 74                                | 1.07                                              | 1.30E+12                                                      | 1.40E+12                                          |
| Os       | PF <sub>3</sub> | Non-class. perp      | T.S.               | -293.9                                             | 67                                | 1.06                                              | 8.44E+11                                                      | 8.95E+11                                          |
|          |                 | TS scrambling        | T.S.               | -520.8                                             | 119                               | 1.19                                              | 8.44E+11                                                      | 1.01E+12                                          |

(a) See Scheme 2 in the Text for schematic representation of the complexes.

(b) All structures listed in this Table are transition states with a single imaginary frequency  $\nu$  (in  $\text{cm}^{-1}$ ).

(c) Crossover temperature (in K, see Reference 34):

$$T_c = \frac{h\nu}{2\pi k_B}$$

(d) Calculated at  $T = 350$  K according to the following eq. (see References 35 and 36):

$$\kappa_{\text{Wigner}} = 1 + \frac{1}{24} \left( \frac{h|\nu|}{k_B T} \right)^2$$

(e) Rate constants calculated according to the Eyring equation, with  $T = 350$  K, activation free energies ( $\Delta G^\ddagger$ ) calculated at the PBE/SDD/6-311G\*\* level (see Table 1) and a transmission coefficient of 1:

$$k_{\text{TST}} = \frac{k_B T}{h} e^{-\frac{\Delta G^\ddagger}{RT}}$$

(f) “Wigner-corrected” rate constants, calculated as:

$$k' = \kappa_{\text{Wigner}} \cdot k_{\text{TST}}$$

$h$ ,  $k_B$  and  $R$  are the Planck constant, the Boltzmann constant and the ideal gas constant, respectively.

**Table S2:** Geometrical parameters of the optimized complexes.<sup>(a)</sup>

| M                                 | L               | Isomer<br>(b)  | Type<br>(c)                | d1<br>(Å) | d2<br>(Å) | d3<br>(Å) | $\Delta d$<br>(Å) | $\alpha$<br>° | $\phi$<br>° | $\Delta E_{rel}/\Delta G_{rel}$<br>kcal/mol |
|-----------------------------------|-----------------|----------------|----------------------------|-----------|-----------|-----------|-------------------|---------------|-------------|---------------------------------------------|
| [MH <sub>4</sub> L <sub>3</sub> ] |                 |                |                            |           |           |           |                   |               |             |                                             |
| Fe                                | NH <sub>3</sub> | Non-classical  | Min.                       | 0.99      | 1.76      | 2.02      | 1.03              | 171.9         | 0.1         | 0.0                                         |
|                                   |                 | Non-clas. perp | T.S.                       | 0.88      | 2.23      | 2.23      | 1.35              | 161.9         | 90.2        | 6.0 [7.2]                                   |
|                                   |                 | Classical      | Min.                       | 1.67      | 1.49      | 1.67      | 0.00              | 175.5         | 0.1         | 1.3 [1.8]                                   |
|                                   |                 | TS exchange    | T.S.                       | 1.35      | 1.59      | 1.86      | 0.51              | 174.1         | 0.0         | 1.2 [1.5]                                   |
| Fe                                | PH <sub>3</sub> | Non-classical  | Min.                       | 0.90      | 1.89      | 1.98      | 1.08              | 156.8         | 0.2         | 0.0                                         |
|                                   |                 | Non-clas. perp | T.S.                       | 0.88      | 2.19      | 2.13      | 1.25              | 148.0         | 90.4        | 1.2 [1.2]                                   |
|                                   |                 | Classical      | T.S.                       | 1.54      | 1.77      | 1.55      | 0.01              | 166.0         | 0.0         | 5.1 [4.1]                                   |
| Fe                                | PF <sub>3</sub> | Non-classical  | Min.                       | 0.88      | 1.86      | 2.04      | 1.16              | 146.8         | 0.4         | 0.0                                         |
|                                   |                 | Non-clas. perp | Min.                       | 0.88      | 2.14      | 2.15      | 1.27              | 140.2         | 90.5        | 0.4 [-1.1]                                  |
|                                   |                 | TS rotation    | T.S.                       | 0.87      | 2.03      | 2.14      | 1.27              | 141.1         | 74.6        | 0.4 [0.1]                                   |
|                                   |                 | Classical      | T.S.                       | 1.48      | 1.87      | 1.60      | 0.12              | 159.4         | 0.0         | 7.7 [6.8]                                   |
| Ru                                | NH <sub>3</sub> | Non-classical  | → classical <sup>(d)</sup> |           |           |           |                   |               |             |                                             |
|                                   |                 | Non-clas. perp | T.S.                       | 0.95      | 2.32      | 2.30      | 1.35              | 163.1         | 92.8        | 5.4 [4.9]                                   |
|                                   |                 | Classical      | Min.                       | 1.81      | 1.66      | 1.82      | 0.01              | 175.2         | 0.0         | 0.0                                         |
| Ru                                | PH <sub>3</sub> | Non-classical  | Min.                       | 0.90      | 2.10      | 2.10      | 1.20              | 161.7         | 0.0         | 0.0                                         |
|                                   |                 | Non-clas. perp | T.S.                       | 0.87      | 2.38      | 2.21      | 1.34              | 154.8         | 90.8        | 2.3 [1.9]                                   |
|                                   |                 | Classical      | Min.                       | 1.74      | 1.83      | 1.79      | 0.05              | 168.5         | 0.0         | 3.0 [2.0]                                   |
|                                   |                 | TS exchange    | T.S.                       | 1.39      | 1.92      | 1.94      | 0.55              | 166.4         | 0.0         | 3.3 [1.5]                                   |
| Ru                                | PF <sub>3</sub> | Non-classical  | Min.                       | 0.87      | 2.09      | 2.14      | 1.27              | 155.5         | 0.1         | 0.0                                         |
|                                   |                 | Non-clas. perp | T.S.                       | 0.85      | 2.37      | 2.30      | 1.45              | 145.7         | 90.5        | 1.7 [0.9]                                   |
|                                   |                 | TS exchange    | T.S.                       | 1.54      | 1.90      | 1.89      | 0.35              | 163.9         | 9.6         | 7.2 [6.4]                                   |
|                                   |                 | Classical      | Min.                       | 1.72      | 1.87      | 1.82      | 0.10              | 164.9         | 0.0         | 7.0 [5.6]                                   |
| Os                                | NH <sub>3</sub> | Non-classical  | → classical <sup>(d)</sup> |           |           |           |                   |               |             |                                             |
|                                   |                 | Non-clas. perp | T.S.                       | 1.42      | 2.30      | 2.43      | 1.01              | 157.1         | 90.2        | 9.0 [9.1]                                   |
|                                   |                 | Classical      | Min.                       | 1.89      | 1.71      | 1.89      | 0.00              | 175.7         | 0.0         | 0.0                                         |
| Os                                | PH <sub>3</sub> | Non-classical  | Min.                       | 1.02      | 2.09      | 2.13      | 1.11              | 165.2         | 0.0         | 1.9 [1.5]                                   |
|                                   |                 | Non-clas. perp | T.S.                       | 0.91      | 2.39      | 2.26      | 1.35              | 157.1         | 90.7        | 5.4 [5.3]                                   |
|                                   |                 | Classical      | Min.                       | 1.83      | 1.86      | 1.86      | 0.03              | 169.4         | 0.0         | 0.0                                         |
|                                   |                 | TS exchange    | T.S.                       | 1.10      | 2.06      | 2.11      | 1.01              | 165.8         | 0.0         | 2.0 [1.2]                                   |
| Os                                | PF <sub>3</sub> | Non-classical  | Min.                       | 0.92      | 2.12      | 2.15      | 1.23              | 160.7         | 0.0         | 0.0                                         |
|                                   |                 | Non-clas. perp | T.S.                       | 0.87      | 2.39      | 2.30      | 1.43              | 152.1         | 90.7        | 2.7 [1.5]                                   |
|                                   |                 | Classical      | Min.                       | 1.83      | 1.88      | 1.87      | 0.04              | 166.2         | 0.0         | 1.6 [1.0]                                   |
|                                   |                 | TS exchange    | T.S.                       | 1.30      | 1.99      | 2.03      | 0.73              | 164.8         | 0.0         | 2.5 [1.5]                                   |

(a) Static calculations. Geometries are computed at the PBE/SDD/6-31G\*\* level.  $d1$ ,  $d2$  and  $d3$  stand for  $d(H1-H2)$ ,  $d(H2-H3)$  and  $d(H3-H4)$ , respectively.  $\Delta d = d3 - d1$ .

Relative energies and Free energies at the PBE/SDD/6-311+G\*\* are also given (see Table 1 for more details).

(b) See Scheme 2 for schematic representation of the complexes.

(c) Indicates whether the structure is a minimum (“Min.”) or a transition state (T.S.).

(d) The optimization leads to the classical isomer.

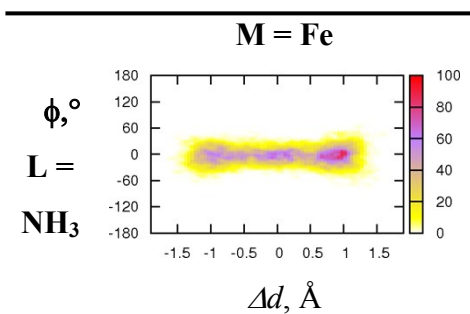

**Figure S1:** Correlation between the non-classical/classical hydride exchange and the rotational motion of H<sub>2</sub> in [FeH<sub>4</sub>(NH<sub>3</sub>)<sub>3</sub>] over 30 ps of MD, using a tighter criterion for convergence of the energy (10<sup>-7</sup> h instead of 10<sup>-6</sup> h) and a halved timestep (0.275 fs).

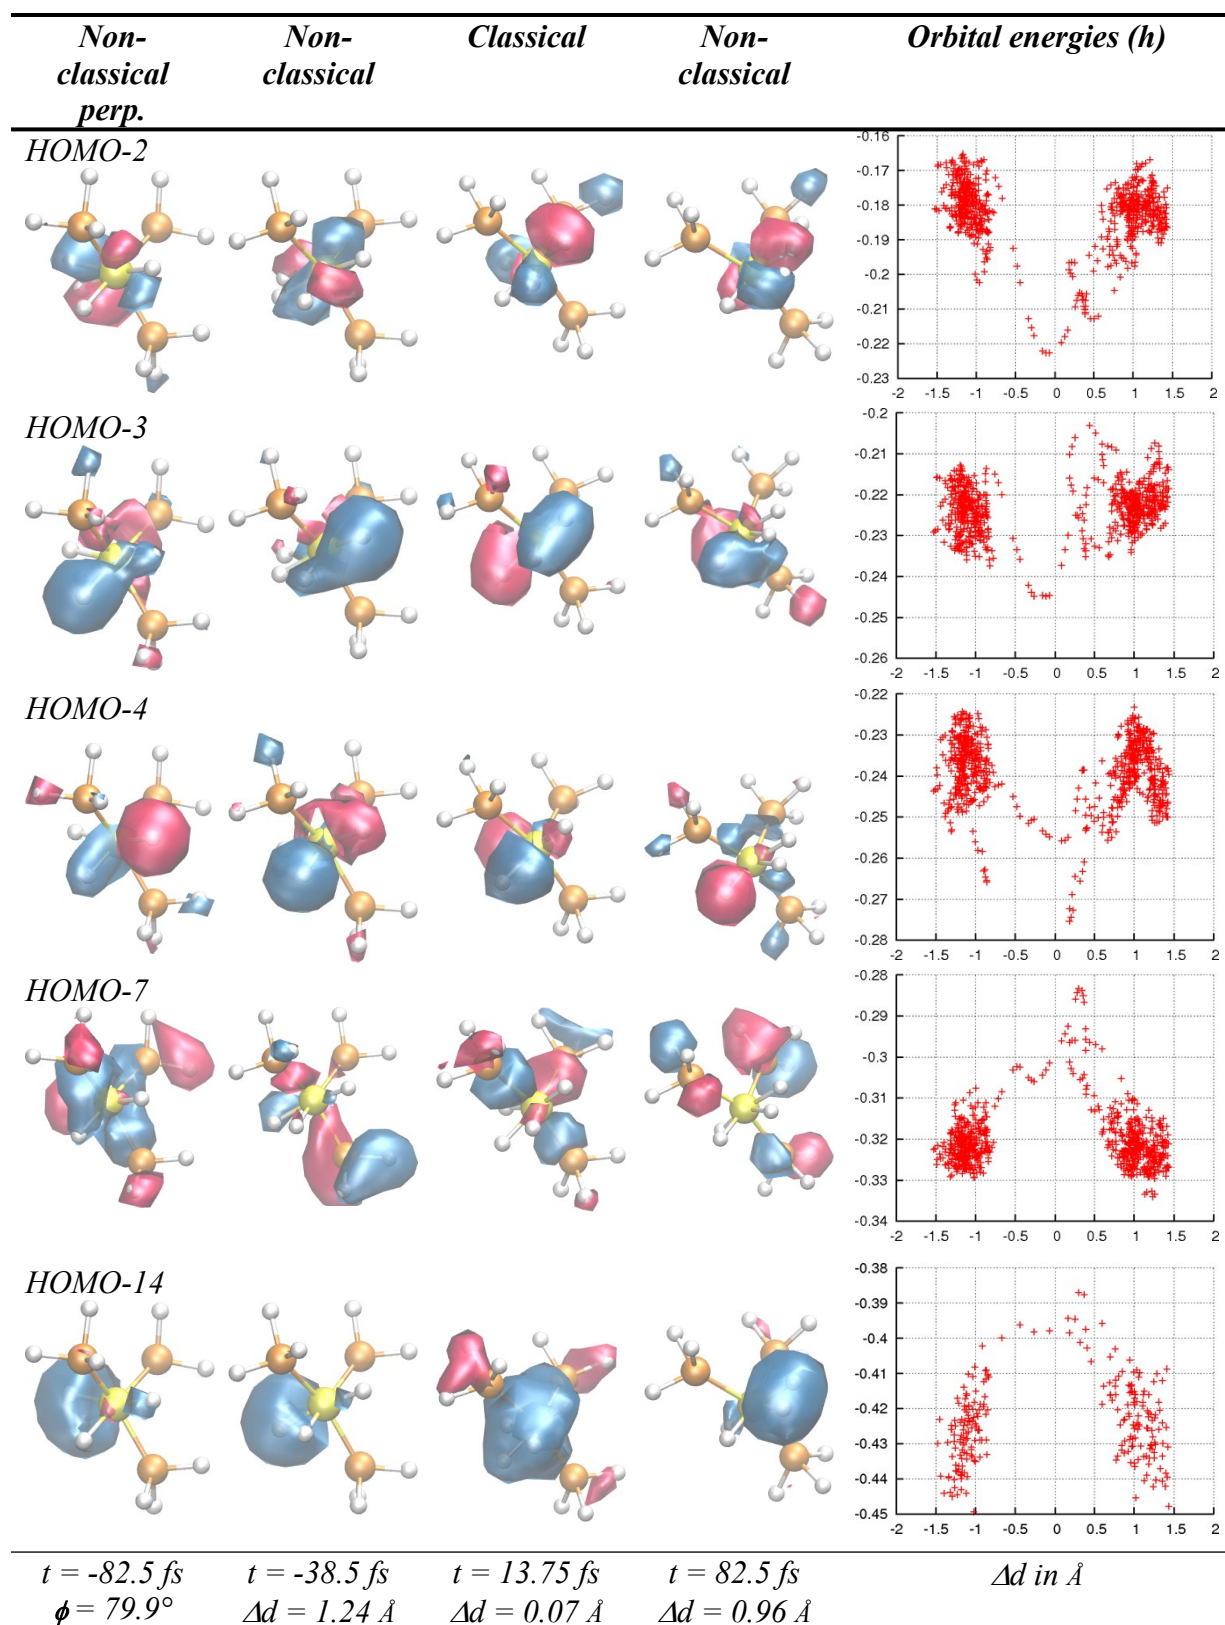

**Figure S2:** Time evolution of molecular orbitals during the scrambling process in  $[\text{FeH}_4(\text{PH}_3)_3]$ . The same isosurface value has been used to plot the orbitals and the complexes are shown in the same orientation.

**Cartesian coordinates of selected complexes (PBE/SDD/6-31G\*\* optimized geometries):**

17

[FeH4(NH3)3] - Classical (Minimum)

|    |           |           |           |
|----|-----------|-----------|-----------|
| Fe | 0.003474  | -0.020037 | 0.000081  |
| N  | -0.006295 | 0.022457  | 2.029552  |
| N  | 0.148809  | 0.022448  | -2.024355 |
| N  | -1.736510 | -1.159644 | -0.066458 |
| H  | 0.041088  | 0.999265  | 2.331067  |
| H  | -0.813685 | -0.398587 | 2.507811  |
| H  | 0.830545  | -0.455793 | 2.373143  |
| H  | -2.351340 | -0.954872 | 0.728265  |
| H  | -2.293017 | -0.947906 | -0.901262 |
| H  | -1.536604 | -2.162118 | -0.063270 |
| H  | -0.615488 | -0.406234 | -2.562780 |
| H  | 0.211003  | 0.999373  | -2.322797 |
| H  | 1.013705  | -0.448875 | -2.301606 |
| H  | 1.494603  | 0.094412  | 0.057387  |
| H  | 0.763226  | -1.410078 | 0.028877  |
| H  | 0.659788  | 1.324667  | 0.024841  |
| H  | -1.004801 | 1.200516  | -0.038152 |

17

[FeH4(NH3)3] - Non-classical (Minimum)

|    |           |           |           |
|----|-----------|-----------|-----------|
| Fe | -0.003490 | -0.291947 | 0.026835  |
| N  | -2.031180 | -0.403152 | -0.017829 |
| N  | 2.018877  | -0.390087 | -0.126704 |
| N  | -0.009573 | 1.806461  | 0.000585  |
| H  | -2.400513 | -1.000491 | 0.727400  |
| H  | -2.577705 | 0.469403  | -0.005821 |
| H  | -2.222078 | -0.870774 | -0.907711 |
| H  | -0.802748 | 2.226893  | 0.496936  |
| H  | 0.829641  | 2.229049  | 0.412780  |
| H  | -0.059195 | 2.106984  | -0.976833 |
| H  | 2.555365  | 0.487809  | -0.170460 |
| H  | 2.162829  | -0.879237 | -1.013851 |
| H  | 2.438124  | -0.963288 | 0.611121  |
| H  | -0.008802 | -1.787195 | -0.322646 |
| H  | -0.045168 | -0.181285 | -1.550411 |
| H  | 0.034048  | -1.144739 | 1.319375  |
| H  | 0.039613  | -0.215801 | 1.645674  |

17

[FeH4(NH3)3] - TS-exchange (TS)

|    |           |           |           |
|----|-----------|-----------|-----------|
| Fe | 0.000007  | -0.294921 | -0.014224 |
| N  | 2.028163  | -0.382414 | 0.041616  |
| N  | -2.028166 | -0.382444 | 0.041612  |
| N  | -0.000024 | 1.792755  | -0.011830 |
| H  | 2.381881  | -0.959778 | -0.726111 |
| H  | 2.549551  | 0.504206  | 0.016236  |
| H  | 2.268239  | -0.848770 | 0.919976  |
| H  | 0.816591  | 2.184757  | -0.492514 |
| H  | -0.816181 | 2.184715  | -0.493317 |
| H  | -0.000473 | 2.144695  | 0.948263  |
| H  | -2.549542 | 0.504187  | 0.016476  |
| H  | -2.268231 | -0.849014 | 0.919861  |
| H  | -2.381906 | -0.959609 | -0.726253 |
| H  | 0.000071  | -1.705499 | 0.530541  |
| H  | -0.000043 | -0.165566 | 1.570167  |
| H  | 0.000086  | -1.392730 | -1.027191 |
| H  | -0.000024 | -0.168932 | -1.586103 |

17

[FeH4(NH3)3] - Non-classical perp. (TS)

|    |          |           |           |
|----|----------|-----------|-----------|
| Fe | 0.000751 | -0.281717 | 0.094265  |
| H  | 0.000978 | -1.830909 | 0.107113  |
| H  | 0.810813 | 2.166165  | -0.534959 |

|   |           |           |           |
|---|-----------|-----------|-----------|
| H | 0.000646  | -0.270765 | -1.485734 |
| H | -0.438100 | -0.296233 | 1.662940  |
| H | 0.439900  | -0.295994 | 1.662863  |
| H | -0.006698 | 2.328081  | 0.886120  |
| H | -0.818502 | 2.161262  | -0.537738 |
| H | -2.031328 | -0.984246 | -1.051093 |
| H | 2.034558  | -0.977838 | -1.052458 |
| H | -2.457796 | -1.013950 | 0.542876  |
| H | 2.460021  | -1.010719 | 0.541713  |
| H | 2.577659  | 0.404866  | -0.311475 |
| H | -2.577457 | 0.399278  | -0.313937 |
| N | -0.003734 | 1.826846  | -0.008279 |
| N | 2.008656  | -0.443771 | -0.179260 |
| N | -2.006952 | -0.447981 | -0.179194 |

17

| [FeH4(PH3)3] - Non-classical (Minimum) |           |           |           |
|----------------------------------------|-----------|-----------|-----------|
| Fe                                     | 0.003442  | -0.348777 | 0.124655  |
| H                                      | -0.005414 | -1.818772 | -0.255561 |
| H                                      | 0.026677  | 2.618361  | 1.379142  |
| H                                      | -0.037029 | -0.200441 | -1.388782 |
| H                                      | 0.039715  | -1.140140 | 1.503896  |
| H                                      | 0.046782  | -0.275370 | 1.734465  |
| H                                      | -1.069998 | 2.556642  | -0.431834 |
| H                                      | 1.052391  | 2.557723  | -0.472988 |
| H                                      | 2.490258  | -1.501029 | -1.319599 |
| H                                      | -2.554632 | -1.509339 | -1.181512 |
| H                                      | -2.952252 | -1.191006 | 0.884903  |
| H                                      | 2.994799  | -1.193777 | 0.725411  |
| H                                      | 2.961420  | 0.452171  | -0.621941 |
| H                                      | -2.990162 | 0.447532  | -0.471672 |
| P                                      | 0.003834  | 1.826197  | 0.182617  |
| P                                      | 2.099909  | -0.638992 | -0.251278 |
| P                                      | -2.109749 | -0.640973 | -0.139922 |

17

| [FeH4(PH3)3] - Classical (TS) |           |           |           |
|-------------------------------|-----------|-----------|-----------|
| Fe                            | 0.000000  | -0.348521 | 0.003950  |
| P                             | 2.138731  | -0.611977 | -0.000732 |
| P                             | -2.138731 | -0.611977 | -0.000732 |
| P                             | 0.000000  | 1.825410  | 0.006878  |
| H                             | 2.739918  | -1.544986 | -0.901926 |
| H                             | 3.041773  | 0.468933  | -0.291127 |
| H                             | 2.822746  | -1.059558 | 1.173118  |
| H                             | 1.063345  | 2.545094  | -0.631872 |
| H                             | -1.063344 | 2.545093  | -0.631874 |
| H                             | -0.000002 | 2.606027  | 1.206466  |
| H                             | -3.041773 | 0.468932  | -0.291129 |
| H                             | -2.822746 | -1.059555 | 1.173119  |
| H                             | -2.739917 | -1.544988 | -0.901924 |
| H                             | 0.000000  | -1.594568 | 0.832437  |
| H                             | 0.000000  | -0.207980 | 1.519052  |
| H                             | 0.000000  | -1.507443 | -0.934318 |
| H                             | 0.000000  | -0.075294 | -1.503914 |

17

| [FeH4(PH3)3] - Non-classical perp. (TS) |           |           |           |
|-----------------------------------------|-----------|-----------|-----------|
| Fe                                      | -0.000025 | -0.264914 | 0.217001  |
| P                                       | -2.056768 | -0.716683 | -0.163187 |
| P                                       | 2.056698  | -0.716820 | -0.163177 |
| P                                       | 0.000115  | 1.895843  | -0.056523 |
| H                                       | -2.942327 | -1.198932 | 0.855856  |
| H                                       | -2.973166 | 0.259919  | -0.691982 |
| H                                       | -2.358414 | -1.732317 | -1.118578 |
| H                                       | -1.059051 | 2.541023  | -0.782833 |
| H                                       | 0.000251  | 2.841016  | 1.026827  |
| H                                       | 1.059275  | 2.540871  | -0.782975 |
| H                                       | 2.973076  | 0.259681  | -0.692188 |

|   |           |           |           |
|---|-----------|-----------|-----------|
| H | 2.942313  | -1.198912 | 0.855894  |
| H | 2.358281  | -1.732617 | -1.118415 |
| H | -0.000132 | -1.792042 | 0.310344  |
| H | 0.000002  | -0.399193 | -1.297073 |
| H | 0.439579  | -0.218178 | 1.768214  |
| H | -0.439722 | -0.217679 | 1.768177  |

17

[FeH4(PF3)3] - Non-classical (Minimum)

|    |           |           |           |
|----|-----------|-----------|-----------|
| Fe | 0.000337  | -0.171024 | 0.154786  |
| P  | -1.991737 | -0.616935 | -0.182888 |
| P  | 1.972448  | -0.603406 | -0.298413 |
| P  | -0.004890 | 1.920289  | 0.220402  |
| F  | -2.851429 | -1.354570 | 0.954359  |
| F  | -3.053921 | 0.521657  | -0.575102 |
| F  | -2.315818 | -1.619890 | -1.384628 |
| F  | -1.190794 | 2.678528  | 0.993953  |
| F  | 1.221100  | 2.687492  | 0.918890  |
| F  | -0.050304 | 2.764765  | -1.137967 |
| F  | 2.999977  | 0.541976  | -0.757259 |
| F  | 2.232655  | -1.608660 | -1.513703 |
| F  | 2.904289  | -1.329596 | 0.788287  |
| H  | -0.001847 | -1.678709 | -0.049591 |
| H  | -0.043195 | -0.108980 | -1.350673 |
| H  | 0.046326  | -0.844829 | 1.606184  |
| H  | 0.044847  | 0.020493  | 1.761807  |

17

[FeH4(PF3)3] - Non-classical perp. (Minimum)

|    |           |           |           |
|----|-----------|-----------|-----------|
| Fe | 0.023275  | -0.274274 | 0.360109  |
| P  | -1.912990 | -0.922727 | 0.089802  |
| P  | 1.951887  | -0.793522 | -0.143393 |
| P  | -0.065217 | 1.792949  | 0.036063  |
| F  | -2.790602 | -1.414059 | 1.338758  |
| F  | -3.010771 | 0.019268  | -0.605931 |
| F  | -2.124710 | -2.205028 | -0.840547 |
| F  | -0.171983 | 2.358193  | -1.458387 |
| F  | -1.264869 | 2.645407  | 0.683633  |
| F  | 1.142466  | 2.725996  | 0.542171  |
| F  | 2.893839  | 0.217256  | -0.960460 |
| F  | 3.003181  | -1.222177 | 0.989089  |
| F  | 2.135098  | -2.061516 | -1.099056 |
| H  | 0.088063  | -1.780711 | 0.596808  |
| H  | -0.059112 | -0.501917 | -1.128843 |
| H  | 0.548739  | -0.124043 | 1.877782  |
| H  | -0.324751 | -0.152371 | 1.930487  |

17

[FeH4(PF3)3] - TS-rotation (TS)

|    |           |           |           |
|----|-----------|-----------|-----------|
| Fe | -0.014459 | -0.283937 | -0.359584 |
| P  | 1.923196  | -0.890462 | 0.010641  |
| P  | -1.963543 | -0.831377 | 0.011525  |
| P  | 0.043938  | 1.779454  | -0.009411 |
| F  | 2.844507  | -1.436637 | -1.183068 |
| F  | 2.990471  | 0.096993  | 0.690880  |
| F  | 2.115314  | -2.121893 | 1.011675  |
| F  | 0.138938  | 2.328666  | 1.491590  |
| F  | 1.233837  | 2.654392  | -0.644709 |
| F  | -1.174657 | 2.702211  | -0.506894 |
| F  | -2.952618 | 0.139836  | 0.821101  |
| F  | -2.949541 | -1.208847 | -1.196186 |
| F  | -2.195221 | -2.141181 | 0.897573  |
| H  | -0.058543 | -1.790982 | -0.594843 |
| H  | -0.033258 | -0.527206 | 1.128701  |
| H  | -0.422620 | 0.032179  | -1.890026 |
| H  | 0.377219  | -0.317714 | -1.923636 |

17



## [FeH4(PF3)3] - Classical (TS)

|    |           |           |           |
|----|-----------|-----------|-----------|
| Fe | -0.002770 | -0.221989 | 0.017374  |
| P  | -2.049694 | -0.583291 | -0.004756 |
| P  | 2.040666  | -0.603146 | 0.012218  |
| P  | 0.007635  | 1.860088  | -0.054634 |
| F  | -2.541050 | -2.096184 | -0.154677 |
| F  | -2.943361 | -0.181495 | 1.261001  |
| F  | -2.965431 | 0.064583  | -1.149130 |
| F  | -1.201623 | 2.658261  | 0.631264  |
| F  | 1.218891  | 2.646519  | 0.641226  |
| F  | 0.017167  | 2.641949  | -1.449509 |
| F  | 2.972031  | 0.035352  | -1.124786 |
| F  | 2.518509  | -2.120800 | -0.133190 |
| F  | 2.927762  | -0.209564 | 1.285160  |
| H  | -0.005860 | -1.514159 | -0.736449 |
| H  | 0.004053  | -0.098065 | -1.487545 |
| H  | -0.012342 | -1.251949 | 1.112400  |
| H  | -0.006902 | 0.176950  | 1.478391  |

17

## [RuH4(NH3)3] - Classical (Minimum)

|    |           |           |           |
|----|-----------|-----------|-----------|
| Ru | -0.002993 | -0.333104 | 0.028016  |
| N  | -2.147317 | -0.429168 | 0.094828  |
| N  | 2.142456  | -0.416405 | -0.028251 |
| N  | -0.013820 | 1.912677  | -0.093838 |
| H  | -2.427430 | -0.963188 | 0.921411  |
| H  | -2.647076 | 0.467869  | 0.134473  |
| H  | -2.487070 | -0.926778 | -0.732081 |
| H  | -0.824491 | 2.318369  | 0.383610  |
| H  | 0.810460  | 2.323071  | 0.355244  |
| H  | -0.032186 | 2.215217  | -1.069270 |
| H  | 2.638544  | 0.483409  | -0.016749 |
| H  | 2.437052  | -0.911883 | -0.873550 |
| H  | 2.472439  | -0.949096 | 0.780592  |
| H  | -0.019624 | -1.753870 | -0.708011 |
| H  | -0.051780 | -0.206318 | -1.657877 |
| H  | 0.027550  | -1.642288 | 0.947931  |
| H  | 0.043330  | 0.010088  | 1.681963  |

17

## [RuH4(NH3)3] - Non-classical perp. (TS)

|    |           |           |           |
|----|-----------|-----------|-----------|
| Ru | 0.004629  | -0.246109 | 0.068748  |
| N  | -2.120110 | -0.415745 | -0.211430 |
| N  | 2.137050  | -0.367347 | -0.210966 |
| N  | -0.039238 | 2.063064  | -0.011032 |
| H  | -2.480514 | -1.165495 | 0.382386  |
| H  | -2.711000 | 0.412321  | -0.062313 |
| H  | -2.223040 | -0.712569 | -1.185181 |
| H  | 0.641677  | 2.404909  | -0.696186 |
| H  | -0.948893 | 2.417845  | -0.326496 |
| H  | 0.163370  | 2.523484  | 0.880607  |
| H  | 2.711131  | 0.468711  | -0.048974 |
| H  | 2.509004  | -1.118900 | 0.373575  |
| H  | 2.247641  | -0.650168 | -1.188012 |
| H  | 0.030335  | -1.860311 | 0.044263  |
| H  | 0.005366  | -0.249204 | -1.602147 |
| H  | 0.477078  | -0.320322 | 1.718118  |
| H  | -0.469734 | -0.281322 | 1.719469  |

17

## [RuH4(PH3)3] - Classical (Minimum)

|    |           |           |           |
|----|-----------|-----------|-----------|
| Ru | 0.054474  | 0.002149  | 0.002031  |
| P  | 0.141453  | 0.151402  | 2.278989  |
| P  | 0.314543  | 0.152323  | -2.261630 |
| P  | -1.864248 | -1.331787 | -0.071429 |
| H  | 0.400090  | 1.412901  | 2.894947  |
| H  | -0.989285 | -0.184570 | 3.095693  |
| H  | 1.097023  | -0.595745 | 3.035069  |

|   |           |           |           |
|---|-----------|-----------|-----------|
| H | -2.854172 | -1.213674 | 0.955041  |
| H | -2.771541 | -1.215441 | -1.171825 |
| H | -1.811820 | -2.758648 | -0.068201 |
| H | -0.750716 | -0.183604 | -3.162091 |
| H | 0.619007  | 1.414100  | -2.855686 |
| H | 1.325048  | -0.594353 | -2.943060 |
| H | 1.667907  | 0.050474  | 0.063542  |
| H | 0.811602  | -1.466246 | 0.030614  |
| H | 0.582807  | 1.523621  | 0.022497  |
| H | -1.163671 | 1.136090  | -0.044156 |

17

[RuH4(PH3)3] - Non-classical (Minimum)

|    |           |           |           |
|----|-----------|-----------|-----------|
| Ru | 0.002351  | -0.408290 | 0.082062  |
| P  | -2.254401 | -0.648032 | -0.131518 |
| P  | 2.245177  | -0.645702 | -0.248679 |
| P  | 0.003352  | 1.919023  | 0.168022  |
| H  | -3.083473 | -1.156819 | 0.921030  |
| H  | -3.099717 | 0.467480  | -0.450572 |
| H  | -2.755462 | -1.510408 | -1.151016 |
| H  | -1.072238 | 2.647907  | -0.439581 |
| H  | 0.033799  | 2.715494  | 1.360175  |
| H  | 1.045312  | 2.649007  | -0.494393 |
| H  | 3.071842  | 0.470819  | -0.610263 |
| H  | 3.128211  | -1.154591 | 0.758968  |
| H  | 2.693350  | -1.506815 | -1.293550 |
| H  | -0.008636 | -1.972919 | -0.373167 |
| H  | -0.039897 | -0.226326 | -1.535560 |
| H  | 0.042215  | -1.253608 | 1.595164  |
| H  | 0.048205  | -0.386211 | 1.842877  |

17

[RuH4(PH3)3] - TS-exchange (TS)

|    |           |           |           |
|----|-----------|-----------|-----------|
| Ru | -0.000005 | -0.318540 | -0.036376 |
| P  | 2.267036  | -0.572336 | 0.056297  |
| P  | -2.267049 | -0.572308 | 0.056298  |
| P  | 0.000025  | 2.019067  | 0.008543  |
| H  | 2.929403  | -1.425888 | -0.878963 |
| H  | 3.171527  | 0.532670  | -0.090657 |
| H  | 2.880546  | -1.110592 | 1.227469  |
| H  | 1.062248  | 2.767512  | -0.592951 |
| H  | -1.062167 | 2.767544  | -0.592968 |
| H  | 0.000025  | 2.733571  | 1.244698  |
| H  | -3.171528 | 0.532708  | -0.090658 |
| H  | -2.880565 | -1.110555 | 1.227471  |
| H  | -2.929426 | -1.425854 | -0.878961 |
| H  | -0.000002 | -1.826844 | 0.558545  |
| H  | -0.000005 | -0.197143 | 1.614648  |
| H  | -0.000013 | -1.338509 | -1.295473 |
| H  | -0.000003 | 0.000769  | -1.668757 |

17

[RuH4(PH3)3] - Non-classical perp. (TS)

|    |           |           |           |
|----|-----------|-----------|-----------|
| Ru | -0.000019 | -0.283946 | 0.158276  |
| P  | -2.225763 | -0.624485 | -0.205026 |
| P  | 2.225724  | -0.624593 | -0.205014 |
| P  | 0.000091  | 2.026757  | -0.046548 |
| H  | -3.108558 | -1.117832 | 0.806723  |
| H  | -3.095413 | 0.425704  | -0.655130 |
| H  | -2.593591 | -1.568249 | -1.207137 |
| H  | -1.056945 | 2.693545  | -0.754263 |
| H  | 0.000089  | 2.953584  | 1.052849  |
| H  | 1.057224  | 2.693460  | -0.754195 |
| H  | 3.095339  | 0.425539  | -0.655325 |
| H  | 3.108578  | -1.117758 | 0.806772  |
| H  | 2.593530  | -1.568502 | -1.206995 |
| H  | -0.000078 | -1.921127 | 0.157673  |
| H  | 0.000028  | -0.416821 | -1.457825 |

|   |           |           |          |
|---|-----------|-----------|----------|
| H | 0.434341  | -0.326546 | 1.875770 |
| H | -0.434502 | -0.326558 | 1.875734 |

17

[OsH4(PH3)3] - Classical (Minimum)

|    |           |           |           |
|----|-----------|-----------|-----------|
| Os | 0.066642  | 0.012943  | 0.002474  |
| P  | 0.141725  | 0.150197  | 2.303360  |
| P  | 0.316895  | 0.150839  | -2.285960 |
| P  | -1.874204 | -1.332313 | -0.071741 |
| H  | 0.395054  | 1.410881  | 2.923295  |
| H  | -0.994525 | -0.193756 | 3.108717  |
| H  | 1.095882  | -0.601717 | 3.056847  |
| H  | -2.859632 | -1.215339 | 0.958385  |
| H  | -2.778563 | -1.214711 | -1.173650 |
| H  | -1.802854 | -2.756604 | -0.069449 |
| H  | -0.754495 | -0.193252 | -3.175728 |
| H  | 0.616342  | 1.411771  | -2.884463 |
| H  | 1.326000  | -0.600567 | -2.964652 |
| H  | 1.715077  | 0.071109  | 0.065402  |
| H  | 0.789683  | -1.507666 | 0.029827  |
| H  | 0.609088  | 1.567320  | 0.023398  |
| H  | -1.199615 | 1.139860  | -0.045716 |

17

[OsH4(PH3)3] - Non-classical (Minimum)

|    |           |           |           |
|----|-----------|-----------|-----------|
| Os | 0.001659  | -0.431378 | 0.055425  |
| P  | -2.287525 | -0.642314 | -0.094813 |
| P  | 2.280109  | -0.639889 | -0.213965 |
| P  | 0.002819  | 1.920513  | 0.145830  |
| H  | -3.087879 | -1.118807 | 0.992989  |
| H  | -3.117431 | 0.485455  | -0.408395 |
| H  | -2.824890 | -1.514445 | -1.087407 |
| H  | -1.075279 | 2.645729  | -0.458992 |
| H  | 0.032736  | 2.693661  | 1.349857  |
| H  | 1.048429  | 2.646780  | -0.512432 |
| H  | 3.091503  | 0.489022  | -0.569157 |
| H  | 3.136412  | -1.116639 | 0.830242  |
| H  | 2.765922  | -1.510529 | -1.234057 |
| H  | -0.011519 | -2.000957 | -0.482093 |
| H  | -0.041757 | -0.190196 | -1.601930 |
| H  | 0.039900  | -1.348855 | 1.499976  |
| H  | 0.046783  | -0.367139 | 1.788921  |

17

[OsH4(PH3)3] - TS-exchange (TS)

|    |           |           |           |
|----|-----------|-----------|-----------|
| Os | -0.000042 | -0.254801 | 0.054035  |
| P  | -2.286910 | -0.474023 | -0.126769 |
| P  | 2.286764  | -0.474393 | -0.126773 |
| P  | 0.000319  | 2.101050  | -0.004306 |
| H  | -3.105700 | -0.878678 | 0.975846  |
| H  | -3.108469 | 0.632476  | -0.525901 |
| H  | -2.810000 | -1.406801 | -1.070770 |
| H  | -1.060443 | 2.785602  | -0.681483 |
| H  | -0.002990 | 2.940261  | 1.153787  |
| H  | 1.065017  | 2.785621  | -0.675358 |
| H  | 3.108869  | 0.633022  | -0.522304 |
| H  | 2.809770  | -1.404530 | -1.073426 |
| H  | 3.105002  | -0.882727 | 0.974881  |
| H  | -0.000101 | -1.838908 | -0.431851 |
| H  | -0.000192 | -0.092852 | -1.621201 |
| H  | 0.000071  | -1.133920 | 1.499570  |
| H  | -0.000243 | -0.063215 | 1.759281  |

17

[OsH4(PH3)3] - Non-classical perp. (TS)

|    |           |           |           |
|----|-----------|-----------|-----------|
| Os | -0.000016 | -0.232881 | 0.111983  |
| P  | -2.261194 | -0.521643 | -0.242893 |
| P  | 2.261165  | -0.521759 | -0.242879 |

|   |           |           |           |
|---|-----------|-----------|-----------|
| P | 0.000101  | 2.096497  | -0.047992 |
| H | -3.138081 | -1.028290 | 0.765210  |
| H | -3.106727 | 0.563228  | -0.652859 |
| H | -2.642863 | -1.428672 | -1.272648 |
| H | -1.059683 | 2.775372  | -0.740641 |
| H | 0.000075  | 2.996387  | 1.073647  |
| H | 1.060007  | 2.775291  | -0.740532 |
| H | 3.106652  | 0.563042  | -0.653128 |
| H | 3.138128  | -1.028159 | 0.765283  |
| H | 2.642807  | -1.428992 | -1.272464 |
| H | -0.000078 | -1.904180 | 0.112297  |
| H | 0.000036  | -0.359162 | -1.540799 |
| H | 0.452508  | -0.296620 | 1.826196  |
| H | -0.452683 | -0.296692 | 1.826147  |
